## CORRECTION

### Exploring the roles of PALB2 at the crossroads of DNA repair and cancer

J. PAUTY, A. RODRIGUE, A. COUTURIER, R. BUISSON and J.-Y. MASSON

Volume 460 (2014), pp. 331–342

In the published article, the incorrect definition for BRCA2 was introduced during the production process as breast cancer early-onset 1. This appears in the Abstract and Introduction. The correct definition should be breast cancer early-onset 2 in both places.

The following sentence appears on page 337: In summary, nine truncating mutations of *PALB2*, eight recurrent notably in breast cancer, have been found so far in ovarian cancer cases including c.172\_175delTTGT (Prokofyeva et al. [91]), c.509\_510delGA (Dansonka-Mieskowska et al. [67]), c.757\_758delCT, c.1050delAACA (Walsh et al. [88]), c.2323C>T (Tischkowitz et al. [79]). The examples of mutations should be omitted, with the full list in Table 1. The correct sentence should read: In summary, nine truncating mutations of *PALB2*, eight recurrent notably in breast cancer, have been found so far in ovarian cancer cases.
